# Supplementary material for: Pore structure controllable synthesis of mesoporous poly(ionic liquid)s by copolymerization of alkylvinylimidazolium salts and divinylbenzene
Source: Royal Society of Chemistry journal article supplement (doi:10.1039/c4ra03163f), 2014-01-01
Supplement: c4ra03163f1.pdf [file c4ra03163f1.pdf]

## Supporting Information

### Pore structure controllable synthesis of mesoporous poly(ionic liquid)s by copolymerization of alkylvinylimidazolium salts and divinylbenzene

Xuping Feng, Chenjue Gao, Zengjing Guo, Yu Zhou\*, Jun Wang\*

*State Key Laboratory of Materials-Oriented Chemical Engineering, College of Chemistry and Chemical Engineering, Nanjing Tech University, Nanjing 210009, China.*

*\* Corresponding author. Tel: +86-25-83172264; E-mail: njutzhouyu@njtech.edu.cn (Y. Zhou), junwang@njtech.edu.cn (J. Wang); Tel: +(86) 25-83172264*

Table S1 Summary of the different experimental conditions employed in the dispersion polymerization of ionic liquids and DVB, the pore structure parameters and the N content of the obtained PIL products.

| NO. | IL  | solvent | Volume <sup>a</sup><br>(mL) | AIBN <sup>b</sup><br>(g) | S <sub>BET</sub> <sup>c</sup><br>(m <sup>2</sup> /g) | Vp <sup>d</sup><br>(cm <sup>3</sup> /g) | Dp <sup>e</sup><br>(nm) | N <sup>f</sup><br>(%) |
|-----|-----|---------|-----------------------------|--------------------------|------------------------------------------------------|-----------------------------------------|-------------------------|-----------------------|
| 1   | C4  | MeOH    | 30                          | 0.09                     | 213                                                  | 0.15                                    | 3.7                     | 3.2                   |
| 2   | C4  | EtOH    | 30                          | 0.09                     | 125                                                  | 0.23                                    | 2.4                     | 1.4                   |
| 3   | C4  | MeCN    | 30                          | 0.09                     | 191                                                  | 0.29                                    | 3.7                     | 1.9                   |
| 4   | C4  | MeCN/EA | 15/15                       | 0.09                     | 341                                                  | 0.61                                    | 13.9                    | 5.0                   |
| 5   | C8  | MeOH    | 30                          | 0.09                     | 33                                                   | 0.05                                    | 3.7                     | 5.6                   |
| 6   | C8  | EtOH    | 30                          | 0.09                     | 41                                                   | 0.08                                    | 3.7                     | 1.6                   |
| 7   | C8  | MeCN    | 30                          | 0.09                     | 192                                                  | 0.47                                    | 3.7                     | 1.9                   |
| 8   | C8  | MeCN/EA | 15/15                       | 0.09                     | 4                                                    | 0.02                                    | 3.7                     | 6.0                   |
| 9   | C12 | MeOH    | 30                          | 0.09                     | 23                                                   | 0.06                                    | 3.7                     | 2.7                   |
| 10  | C12 | EtOH    | 30                          | 0.09                     | 20                                                   | 0.07                                    | 3.3                     | 2.0                   |
| 11  | C12 | MeCN    | 30                          | 0.09                     | 127                                                  | 0.30                                    | 3.7                     | 2.3                   |
| 12  | C12 | MeCN/EA | 15/15                       | 0.09                     | 3                                                    | 0.02                                    | 3.7                     | 5.4                   |
| 13  | C16 | MeOH    | 30                          | 0.09                     | 9                                                    | 0.03                                    | 2.7                     | 2.6                   |
| 14  | C16 | EtOH    | 30                          | 0.09                     | 13                                                   | 0.05                                    | 2.4                     | 2.3                   |
| 16  | C16 | MeCN    | 30                          | 0.09                     | 5                                                    | 0.01                                    | 2.4                     | 1.5                   |
| 17  | C16 | MeCN/EA | 15/15                       | 0.09                     | 41                                                   | 0.51                                    | 33                      | 4.4                   |

<sup>a</sup> solvent volume used in the synthesis; <sup>b</sup> the molar ratio of ionic liquid to AIBN; <sup>c</sup> BET surface area; <sup>d</sup> total pore volume; <sup>e</sup> BJH mesopore diameter calculated from the adsorption branch; <sup>f</sup> the nitrogen content in the final PILs.

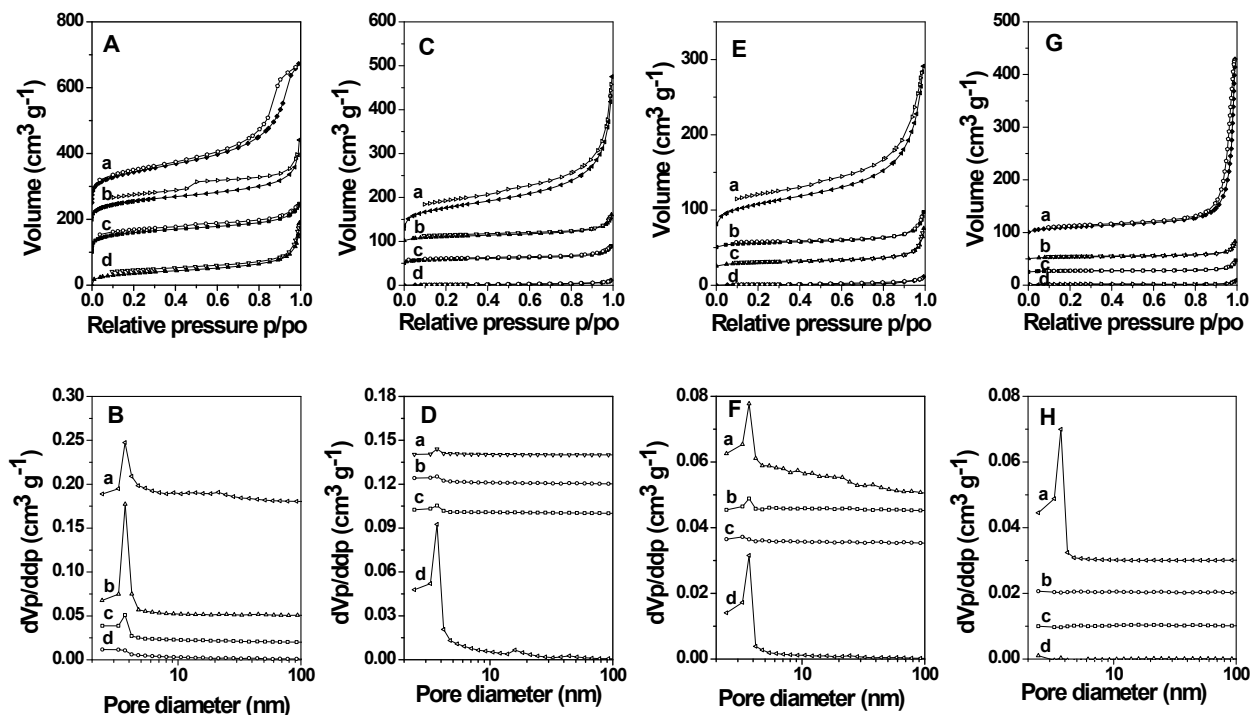

Figure S1 Nitrogen adsorption-desorption isotherms (A) and pore size distributions (B) of the poly(VI-C4--DVB) prepared in five kinds of solvent: (a) MeCN/EA (15/15), (b) MeCN, (c) MeOH and (d) EtOH. The adsorption isotherms for samples a, b and c are shifted by 250, 200 and 100  $\text{cm}^3 \text{g}^{-1}$ . The pore size distribution curves for samples a, b and c are shifted by 0.04, 0.1 and 0.02  $\text{cm}^3 \text{g}^{-1}$ . Nitrogen adsorption-desorption isotherms (C) and pore size distributions (D) of the poly(VI-C8--DVB) prepared in five kinds of solvent: (a) MeCN, (b) EtOH (c) MeOH and (d) MeCN/EA (15/15). The adsorption isotherms for samples a, b and c are shifted by 100, 100 and 50  $\text{cm}^3 \text{g}^{-1}$ . The pore size distribution curves for samples a, b and c are shifted by 0.14, 0.12 and 0.1  $\text{cm}^3 \text{g}^{-1}$ . Nitrogen adsorption-desorption isotherms (E) and pore size distributions (F) of the poly(VI-C8--DVB) prepared in five kinds of solvent: (a) MeCN, (b) MeOH, (c) EtOH and (d) MeCN/EA (15/15). The adsorption isotherms for samples a, b and c are shifted by 100, 50 and 25  $\text{cm}^3 \text{g}^{-1}$ . The pore size distribution curves for samples a, b and c are shifted by 0.05, 0.1 and 0.035  $\text{cm}^3 \text{g}^{-1}$ . Nitrogen adsorption-desorption isotherms (G) and pore size distributions (H) of the poly(VI-C16--DVB) prepared in five kinds of solvent: (a) MeCN/EA (15/15), (b) EtOH, (c) MeOH and (d) MeCN. The adsorption isotherms for samples a, b and c are shifted by 100, 50 and 25  $\text{cm}^3 \text{g}^{-1}$ . The pore size distribution curves for samples b and c are shifted by 0.02 and 0.01  $\text{cm}^3 \text{g}^{-1}$ .
